# Supplementary material for: Laxative Effects of Total Diterpenoids Extracted from the Roots of Euphorbia pekinensis Are Attributable to Alterations of Aquaporins in the Colon
Source: PubMed Central journal article supplement (PMC6155307; doi:10.3390/molecules22030465), 2017-03-14
Supplement: molecules-22-00465-s001.pdf [file molecules-22-00465-s001.pdf]

The mass spec profile for each peak. As you know, there are too many isomers in diterpenoids, and the response of diterpenoids is not satisfied in UHPLC-ESI-MS. We detect 1-5 compounds, but Pekinenin F is not detected using this method, so we also provide the NMR data of the six compounds.

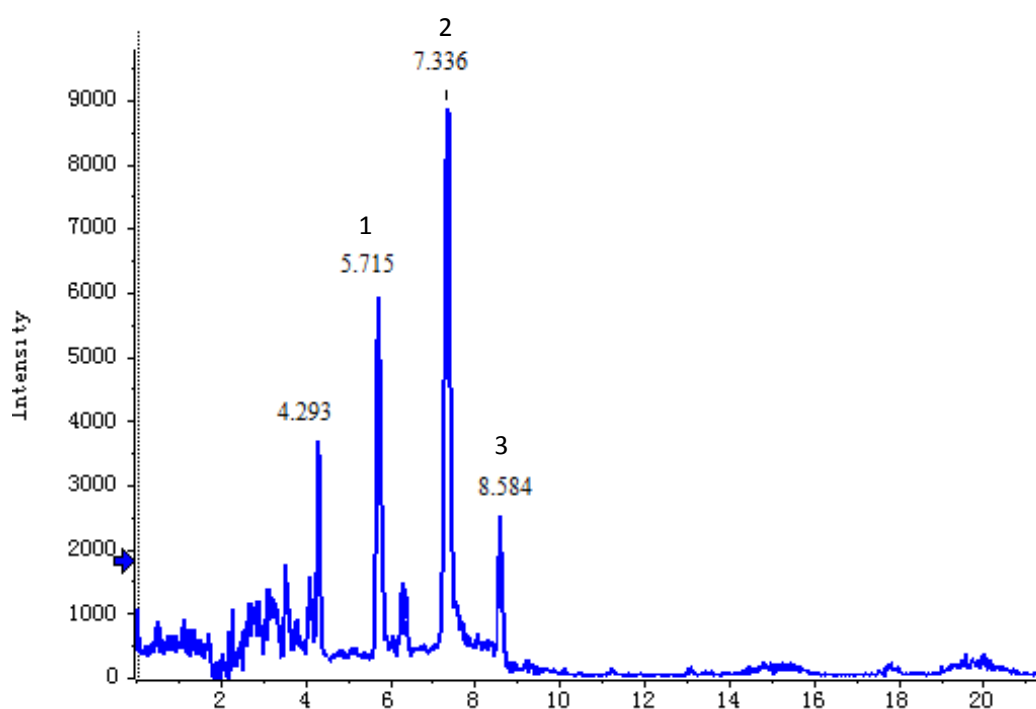

Figure S1. Mass spec profile for Pekinenin G (1), Yuexiandajisu A (2), (-)-(1S)-15-hydroxy-18-carboxyembrene (3)

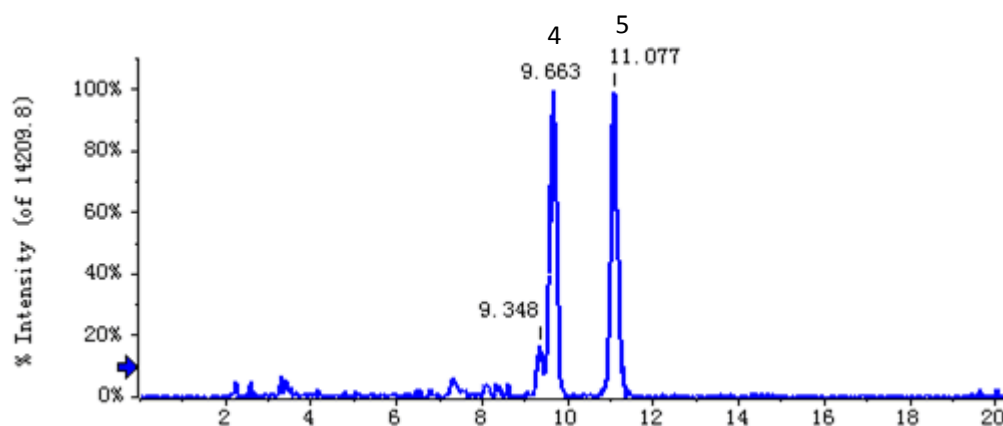

Figure S2. Mass spec profile for pekinenin A (4), pekinenin C (5)

Table S1

| $T_R$ /min                 | [M-H] <sup>-</sup> | Fragment ions           | Formula                                        | Mass Error (ppm) | Purity Score |
|----------------------------|--------------------|-------------------------|------------------------------------------------|------------------|--------------|
| 4.293, 5.715, 7.336, 8.584 | 317                | 317,273,180, 136,112,68 | C <sub>20</sub> H <sub>30</sub> O <sub>3</sub> | -2.6             | 94.7%        |
| 9.663, 11.077              | 301                | 301,164,120, 81         | C <sub>20</sub> H <sub>30</sub> O <sub>2</sub> | -2.6             | 87%          |

# Pekinenin G

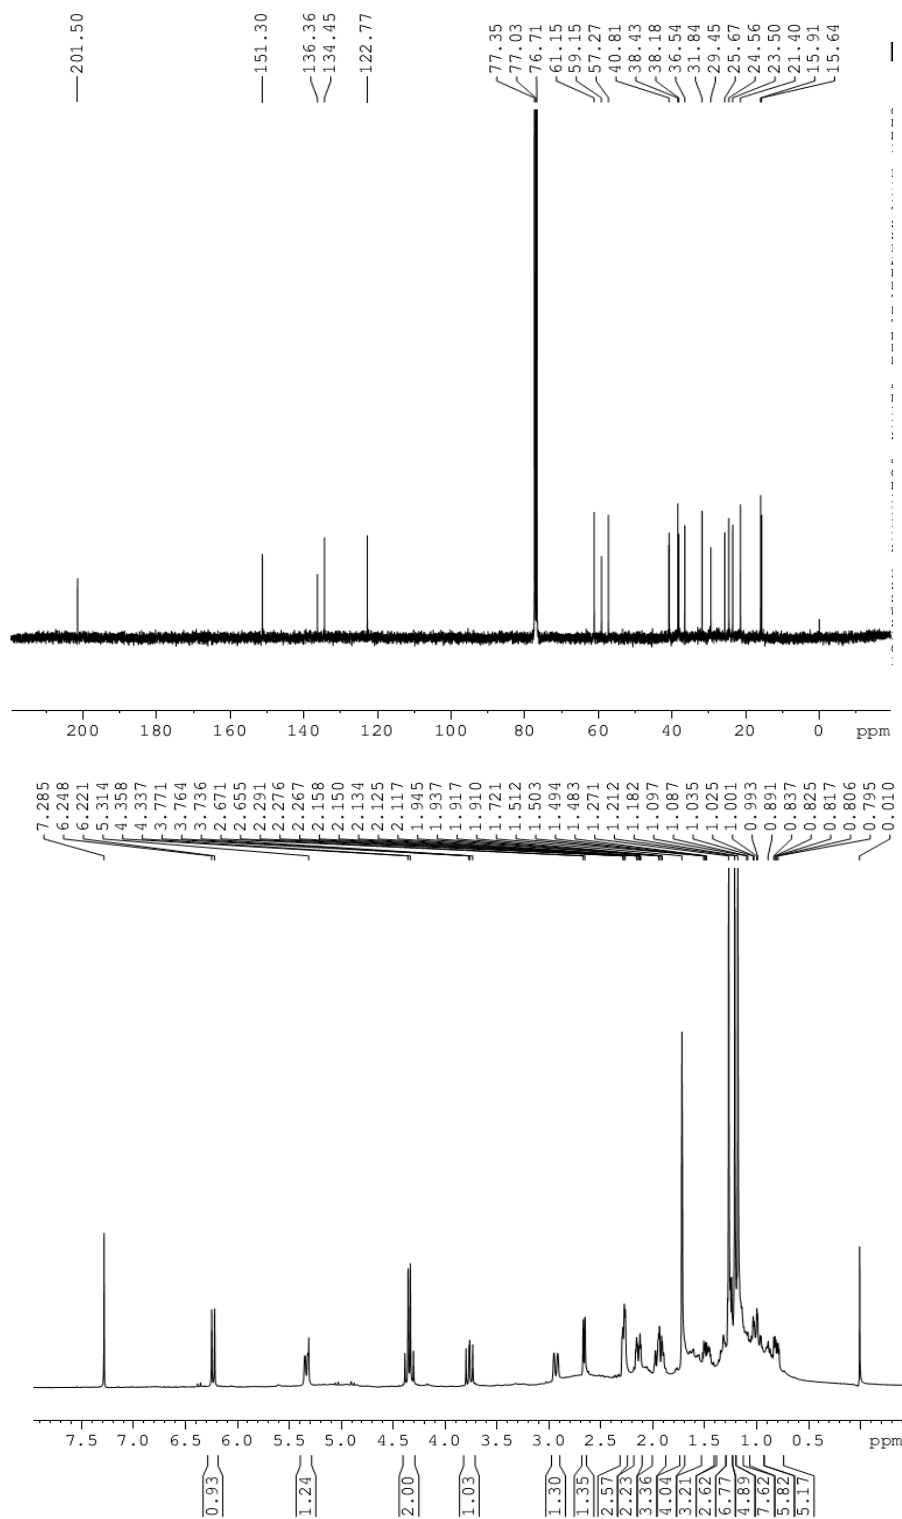

## Reference

Wang, K.; Yu, H.; Wu, H.; Wang, X.; Pan, Y.; Chen, Y.; Liu, L.; Jin, Y.; Zhang, C. A new casbane diterpene from *Euphorbia pekinensis*. *Nat. Prod. Res.* **2015**, *29*, 1456–1460.

# Yuexiandajisu A

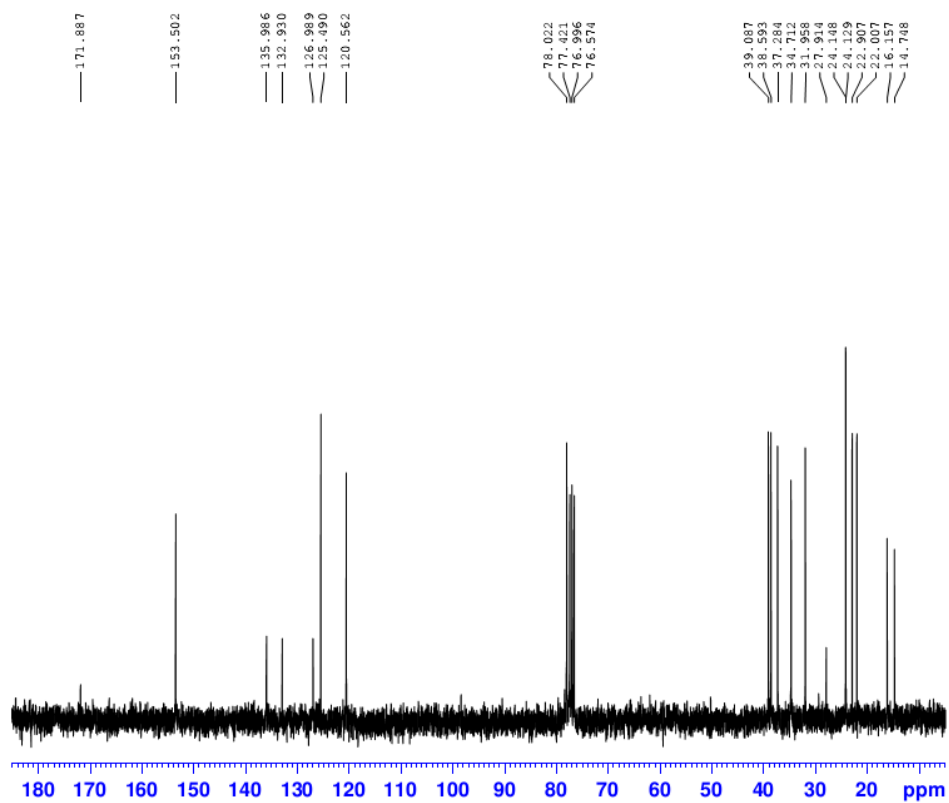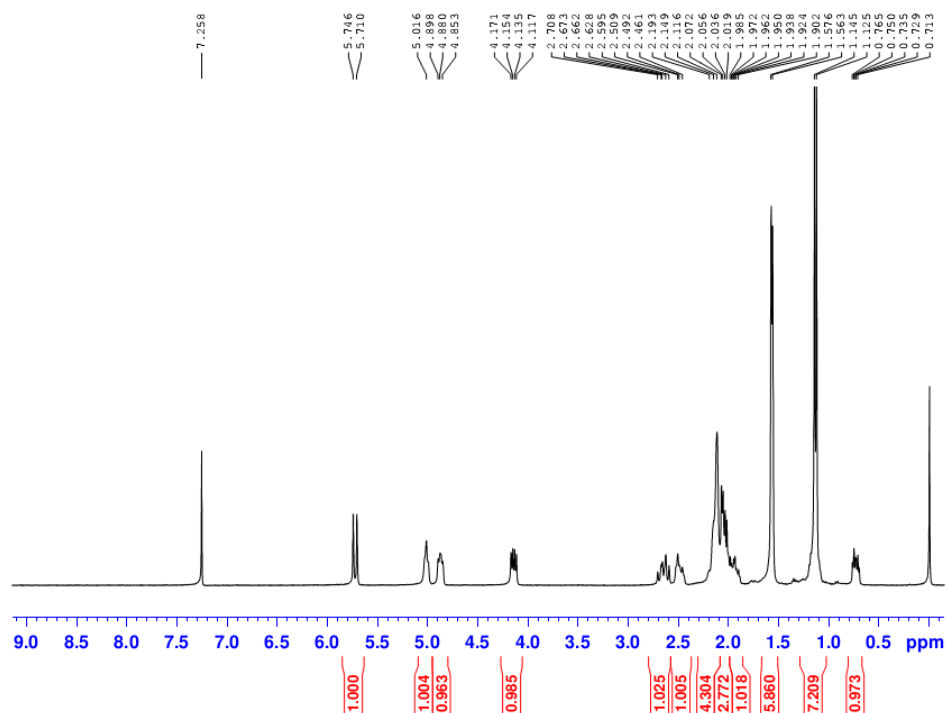

## Reference

Zhihong Xu, Jie Sun, Rensheng Xu, Guowei Qin, Casbane diterprnoids from *Euphorbia ebracteolata*. *Phytochemistry*. 1998,49:149-151.

(-)-(1S)-15-hydroxy-18-carboxycembrene

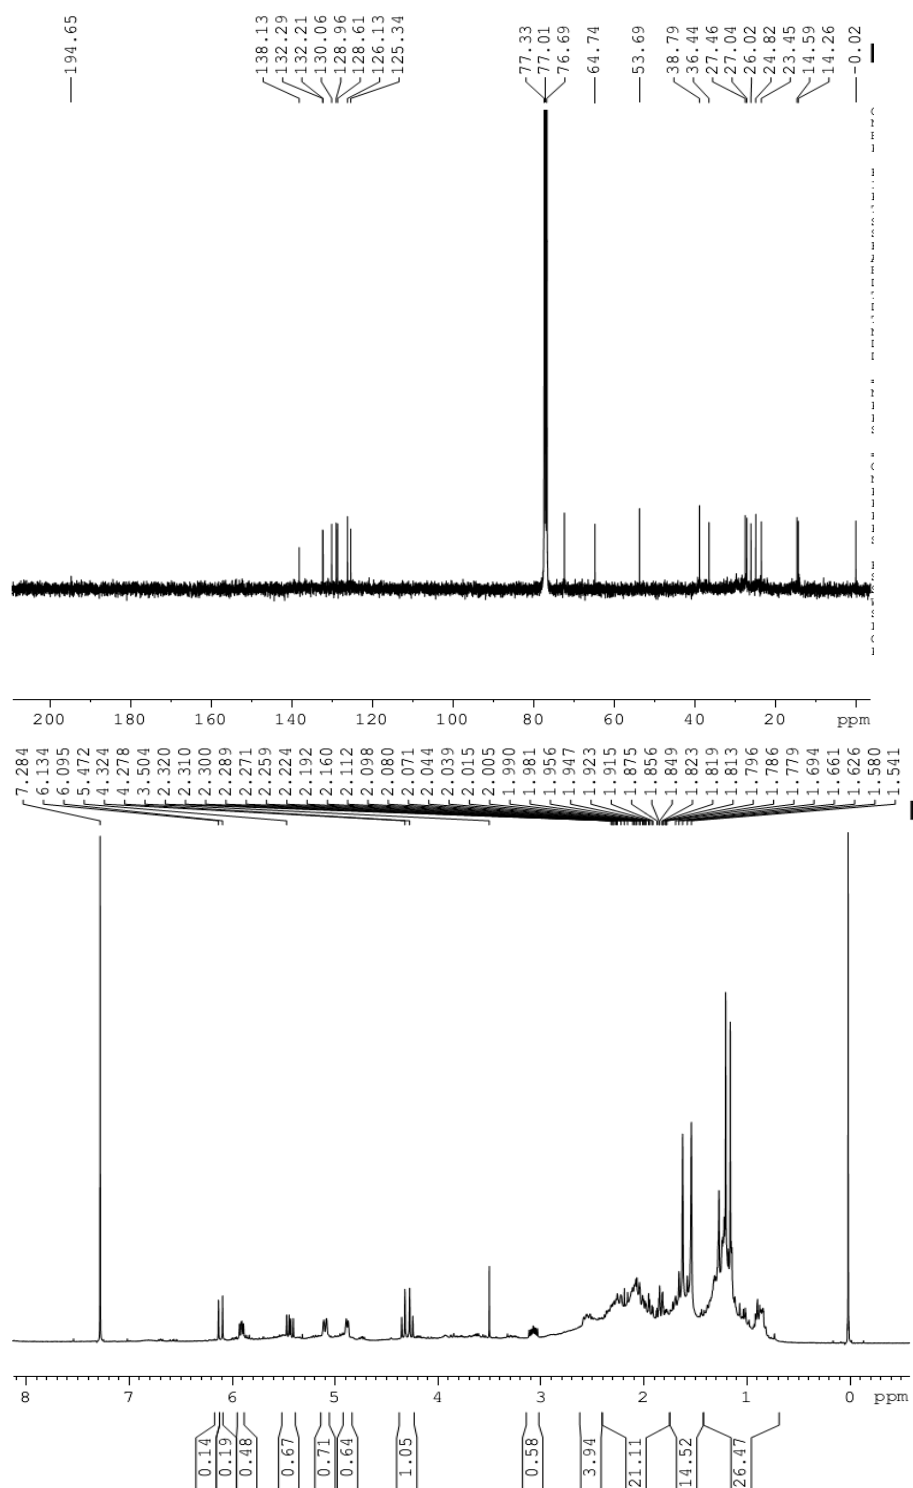

**Reference**

Pengyi Hou, Yan Zeng, Bingjie Ma, Kaishun Bi, Xiaohui Chen, A new cytotoxic cembrene diterpene from the roots of *Euphorbia pekinensis* Rupr, *Fitoterapia*, 2013,90:10-13

Pekinenin A

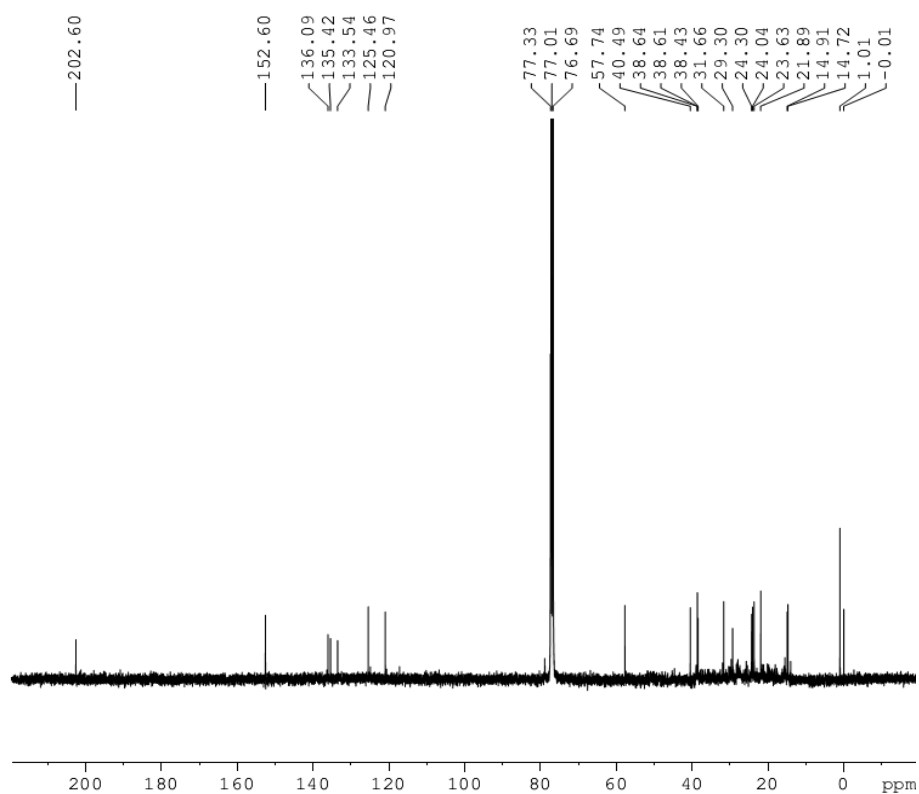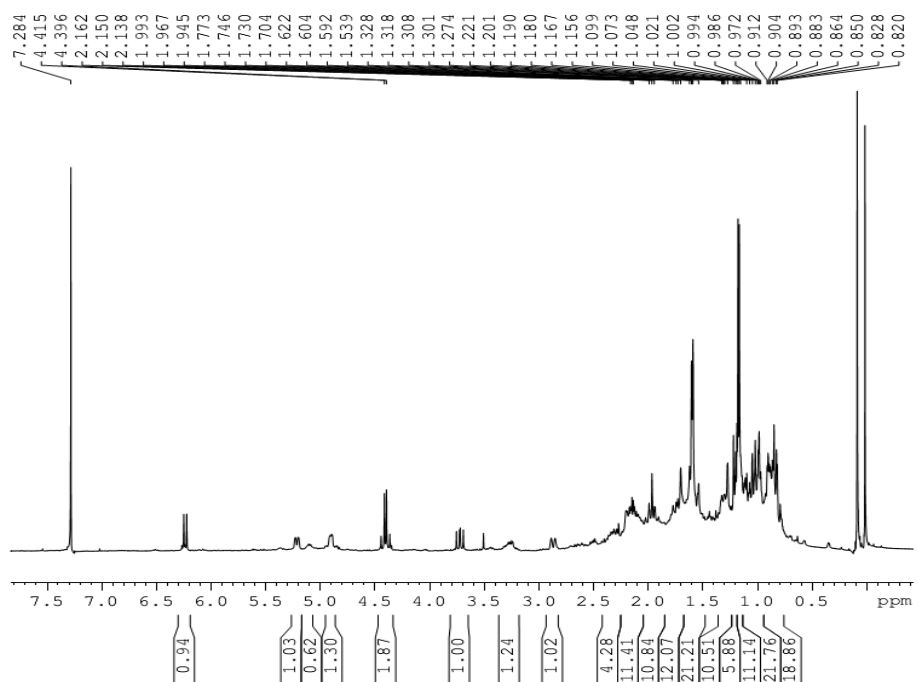

Reference

Shao, F.; Bu, R.; Zhang, C.; Chen, C.; Huang, J.; Wang, J. Two new casbane diterpenoids from the roots of *Euphorbia pekinensis*. *J. Asian Nat. Prod. Res.* **2011**, *13*, 805–810.

# Pekinenin C

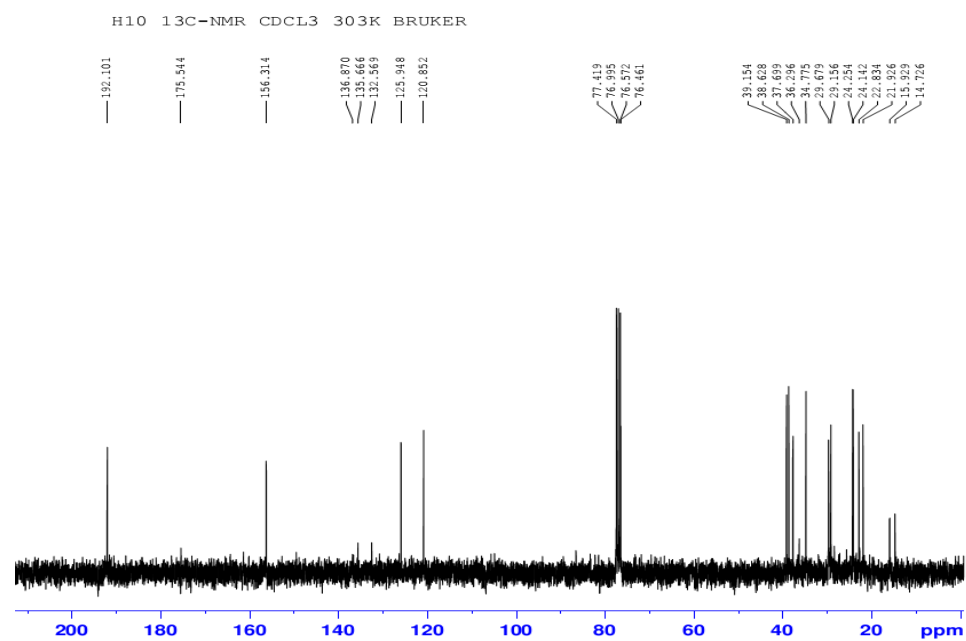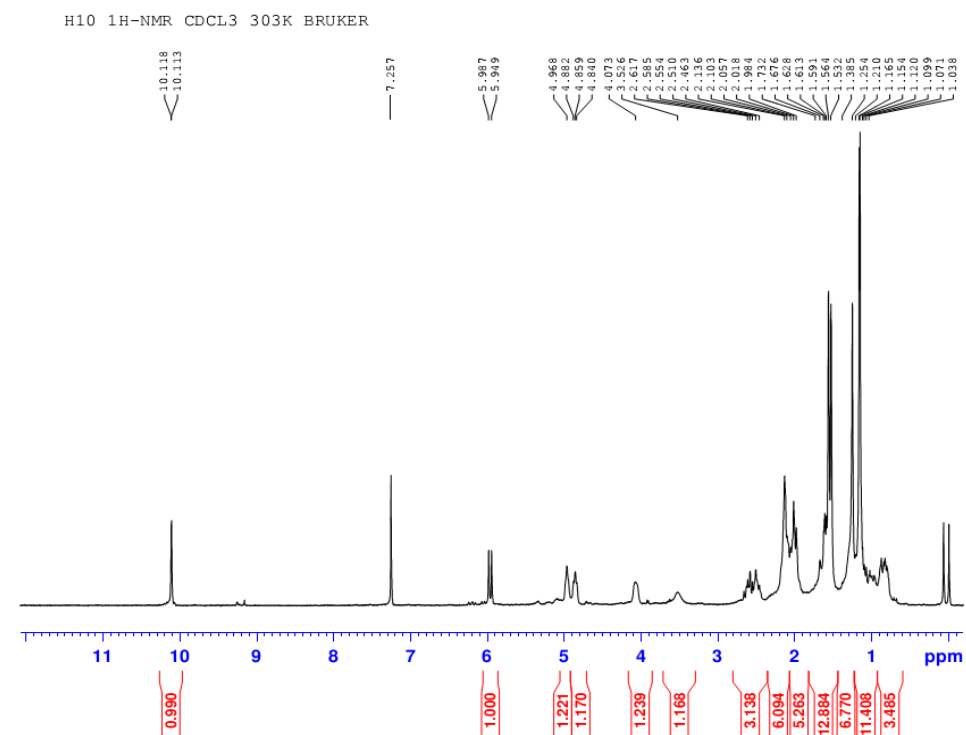

## Reference

Tao, W.; Duan, J.; Tang, Y.; Yang, N.; Li, J.; Qian, Y. Casbane diterpenoids from the roots of *Euphorbia pekinensis*. *Phytochemistry* **2013**, *94*, 249–253.

Pekinenin F

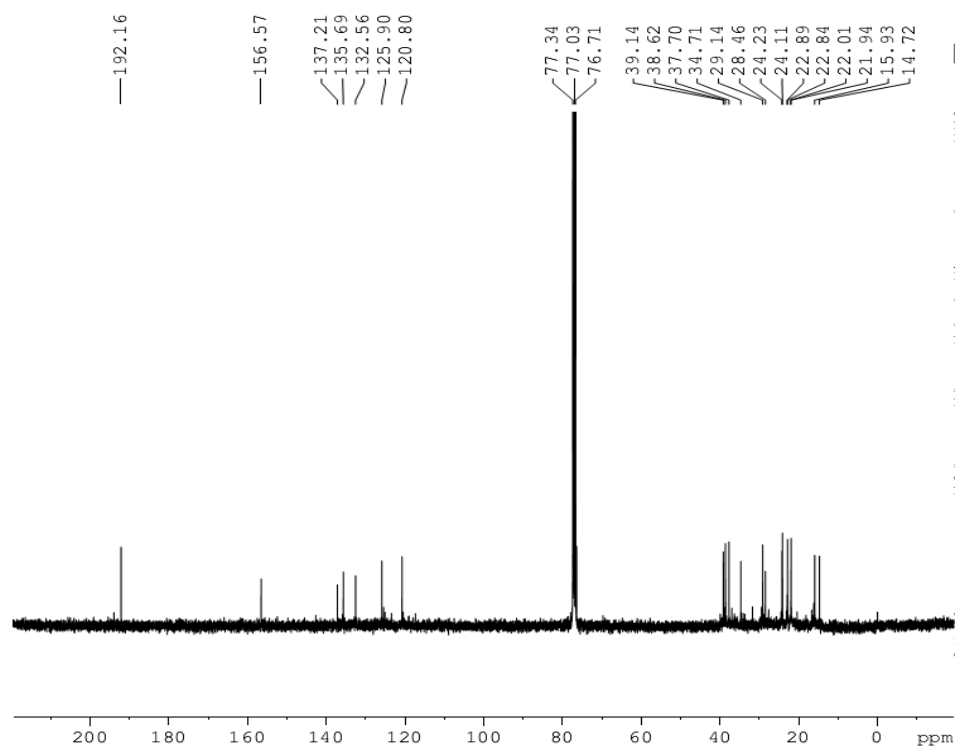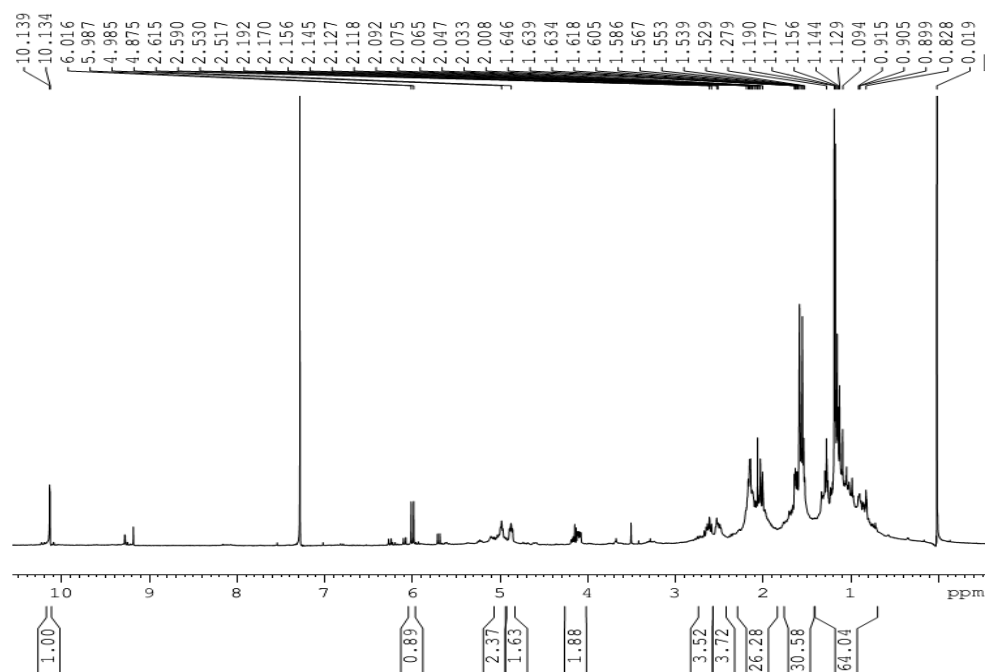

Reference

Tao, W.; Duan, J.; Tang, Y.; Yang, N.; Li, J.; Qian, Y. Casbane diterpenoids from the roots of *Euphorbia pekinensis*. *Phytochemistry* **2013**, *94*, 249–253.
